# Supplementary material for: Mechanism of Action of Ketogenic Diet Treatment: Impact of Decanoic Acid and Beta—Hydroxybutyrate on Sirtuins and Energy Metabolism in Hippocampal Murine Neurons
Source: PubMed Central journal article supplement (PMC7468807; doi:10.3390/nu12082379), 2020-08-08
Supplement: nutrients-12-02379-s001.pdf [file nutrients-12-02379-s001.pdf]

## Mechanism of Action of Ketogenic Diet Treatment: Impact of Decanoic Acid and Beta – Hydroxybutyrate on Sirtuins and Energy Metabolism in Hippocampal Murine Neurons

Partha Dabke, Anibh Das

### Supplementary material – Table S1 (list of primers)

| <b>Primer</b>    | <b>Sequence (5' – 3')</b>             |
|------------------|---------------------------------------|
| SIRT1 (forward)  | <i>CAG ACC CTC AAG CCA TGT TTT</i>    |
| SIRT1 (reverse)  | <i>GAT CCT TTG GAT TCC TGC AA</i>     |
| SIRT2 (forward)  | <i>TTG CCA AGG AGC TCT ATC CC</i>     |
| SIRT2 (reverse)  | <i>GTG TGA TGT GTA GAA GGT GCC</i>    |
| SIRT3 (forward)  | <i>ACT TCC GCT AAA CTT CTC CCG</i>    |
| SIRT3 (reverse)  | <i>CCC ACA CAG AGG GAT ATG GG</i>     |
| SIRT4 (forward)  | <i>TCG ATA GCT CCG CAT TAT GTC AA</i> |
| SIRT4 (reverse)  | <i>GCG GCA CAA ATA ACC CCG AG</i>     |
| MCTr 1 (forward) | <i>TTG GGT TCT GTG TCT ACG CC</i>     |
| MCTr 1 (reverse) | <i>GAG GCG GCC TAA AAG TGG T</i>      |
| MCTr 2 (forward) | <i>CTC CTC TGG CTG GTA AAT TGC</i>    |
| MCTr 2 (reverse) | <i>GGC CTC CAT TTC TCT GGA CG</i>     |
| ACTB (forward)   | <i>ACT CTG TGT GCA TCG GTG GC</i>     |
| ACTB (reverse)   | <i>CAG CTC AGT AAC AGT CCG CC</i>     |
| HPRT1 (forward)  | <i>GCT TAC CTC ACT GCT TTC CG</i>     |
| HPRT1 (reverse)  | <i>CAT CAT CGC TAA TCA CGA CGC</i>    |
| B2M (forward)    | <i>TGT ATG CTA TCC AGA AAA CCC C</i>  |
| B2M (reverse)    | <i>GCA TTT CAA TGT GAG GCG GG</i>     |
